# Supplementary material for: The effect of co-ligands on the performance of single-molecule magnet behaviours in a family of linear trinuclear Zn–Dy–Zn complexes with a compartmental Schiff base
Source: Royal Society of Chemistry journal article supplement (doi:10.1039/d4dt01582g), 2024-01-01
Supplement: d4dt01582g1.pdf [file d4dt01582g1.pdf]

## Supplementary information

### **The effect of co-ligands on the performance of single-molecule magnet behaviours in a family of linear trinuclear Zn-Dy-Zn complexes with a compartmental Schiff base**

Rakhi Nandy<sup>a</sup> Zvonko Jagličić,<sup>b</sup> Narayan Ch. Jana,<sup>c</sup> Paula Brandão,<sup>d</sup> Fabián Bustamante,<sup>e</sup> Daniel Aravena<sup>e</sup> and Anangamohan Panja,<sup>a,c,\*</sup>

<sup>a</sup> *Department of Chemistry, Panskura Banamali College, Panskura RS, WB 721152, India, India. E-mail: ampanja@yahoo.co.in*

<sup>b</sup> *Institute of Mathematics, Physics and Mechanics & Faculty of Civil and Geodetic Engineering, University of Ljubljana, Jadranska 19, 1000 Ljubljana, Slovenia*

<sup>c</sup> *Department of Chemistry, Gokhale Memorial Girls' College, 1/1 Harish Mukherjee Road, Kolkata-700020*

<sup>d</sup> *Department of Chemistry, CICECO-Aveiro Institute of Materials, University of Aveiro, 3810-193 Aveiro, Portugal*

<sup>e</sup> *Department of Materials Chemistry, Faculty of Chemistry and Biology, University of Santiago de Chile, Casilla 40, Correo 33, Santiago, Chile*

## Table of Contents

|                                                                                                                                                                                                                                                                                                      |    |
|------------------------------------------------------------------------------------------------------------------------------------------------------------------------------------------------------------------------------------------------------------------------------------------------------|----|
| <b>Fig. S1.</b> IR spectra of ligand H <sub>2</sub> L and complexes <b>1-3</b> .....                                                                                                                                                                                                                 | 3  |
| <b>Fig. S2.</b> <sup>1</sup> H-NMR of <i>N,N'</i> -bis(3-methoxy-5-methylsalicylidene)-1,2-diaminocyclohexane (H <sub>2</sub> L) .....                                                                                                                                                               | 4  |
| <b>Fig. S3.</b> <sup>13</sup> C-NMR of <i>N,N'</i> -bis(3-methoxy-5-methylsalicylidene)-1,2-diaminocyclohexane (H <sub>2</sub> L) .....                                                                                                                                                              | 4  |
| <b>Fig. S4.</b> Non-covalent interactions in the Schiff base ligand H <sub>2</sub> L .....                                                                                                                                                                                                           | 5  |
| <b>Fig. S5.</b> Simulated and experimental PXRD data for <b>1-3</b> .....                                                                                                                                                                                                                            | 6  |
| <b>Fig. S6.</b> Crystal packing diagram for complex <b>1</b> .....                                                                                                                                                                                                                                   | 7  |
| <b>Fig. S7.</b> Crystal packing diagram for complex <b>2</b> .....                                                                                                                                                                                                                                   | 7  |
| <b>Fig. S8.</b> Crystal packing diagram for complex <b>3</b> .....                                                                                                                                                                                                                                   | 8  |
| <b>Fig. S9.</b> Isothermal magnetization plots at 2 K for <b>1-3</b> .....                                                                                                                                                                                                                           | 8  |
| <b>Fig. S10.</b> AC data for complex <b>3</b> at zero dc field .....                                                                                                                                                                                                                                 | 9  |
| <b>Fig. S11.</b> In-phase (a) and out-of-phase (b) ac susceptibility for <b>1</b> as a function of ac frequencies in zero dc field and the corresponding plots in a 1000 Oe dc field (c and d) with only selected sets of temperatures for clarity. The Cole-Cole plots at 1000 Oe dc field (e)..... | 10 |
| <b>Fig. S12.</b> In-phase (a) and out-of-phase (b) ac susceptibility for <b>2</b> as a function of ac frequencies in zero dc field and the corresponding plots in a 1000 Oe dc field (c and d) with only selected sets of temperatures for clarity. The Cole-Cole plots at 1000 Oe dc field (e)..... | 11 |
| <b>Fig. S13.</b> The plots of $\chi''$ as a function of ac frequency for different applied magnetic fields and at 2 K for <b>1</b> .....                                                                                                                                                             | 12 |
| <b>Fig. S14.</b> The plots of $\chi''$ as a function of ac frequency for different applied magnetic fields and at 2 K for <b>2</b> .....                                                                                                                                                             | 12 |
| <b>Fig. S15.</b> The plots of $\chi''$ as a function of ac frequency for different applied magnetic fields and at 2 K for <b>3</b> .....                                                                                                                                                             | 13 |
| <b>Fig. S16.</b> Field dependence of magnetization of <b>1</b> (left) and <b>2</b> (right) at different temperatures.....                                                                                                                                                                            | 13 |
| <b>Table S1.</b> Crystallographic data and structure refinement parameters of <b>1-4</b> .....                                                                                                                                                                                                       | 14 |
| <b>Table S2.</b> Selected bond parameters around the metal centres in <b>1-3</b> .....                                                                                                                                                                                                               | 15 |
| <b>Table S3.</b> Shape analysis of the structure <b>1-3</b> .....                                                                                                                                                                                                                                    | 15 |
| <b>Table S4.</b> Relaxation fitting parameters from the least-square fitting of the Cole-Cole plots of <b>1</b> .....                                                                                                                                                                                | 16 |
| <b>Table S5.</b> Relaxation fitting parameters from the least-square fitting of the Cole-Cole plots of <b>2</b> .....                                                                                                                                                                                | 18 |
| <b>Table S6.</b> Relaxation fitting parameters from the least-square fitting of the Cole-Cole plots of <b>3</b> .....                                                                                                                                                                                | 20 |
| <b>Table S7.</b> CASSCF energies (cm <sup>-1</sup> ) and g-factors for the first eight Kramers' doublets of <b>1-3</b> .....                                                                                                                                                                         | 21 |
| <b>Table S8.</b> Structural and magnetic features of linear trinuclear Zn-Dy-Zn complexes with salen-type compartmental Schiff base ligands.....                                                                                                                                                     | 22 |

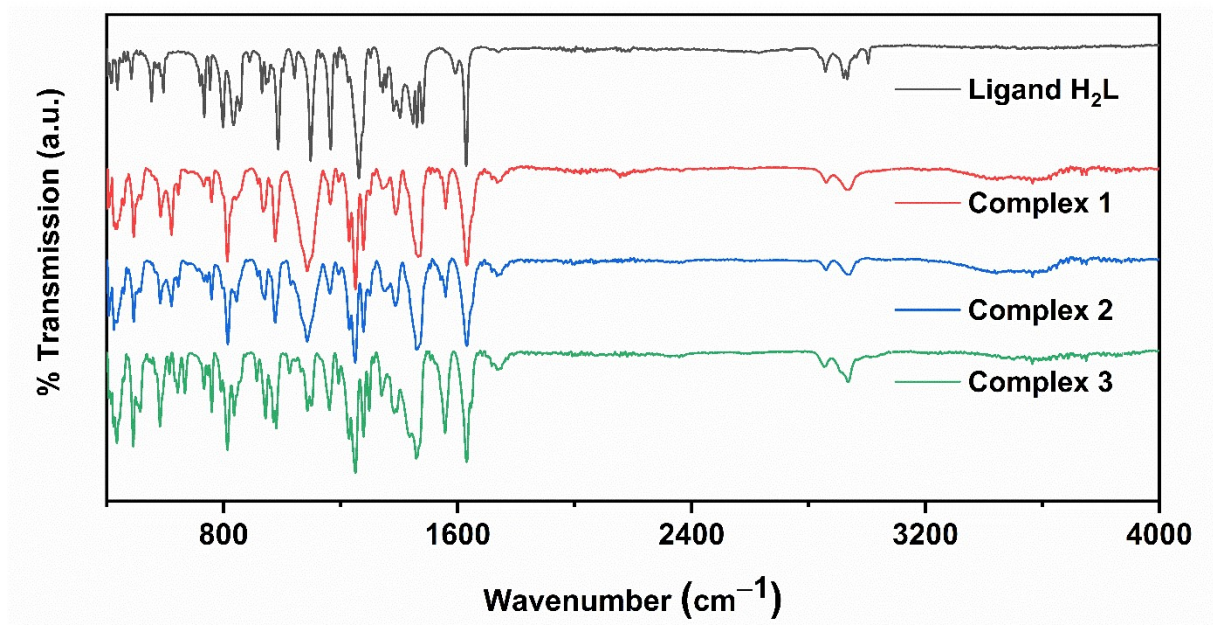

Fig. S1. IR spectra of ligand H<sub>2</sub>L and complexes 1-3.

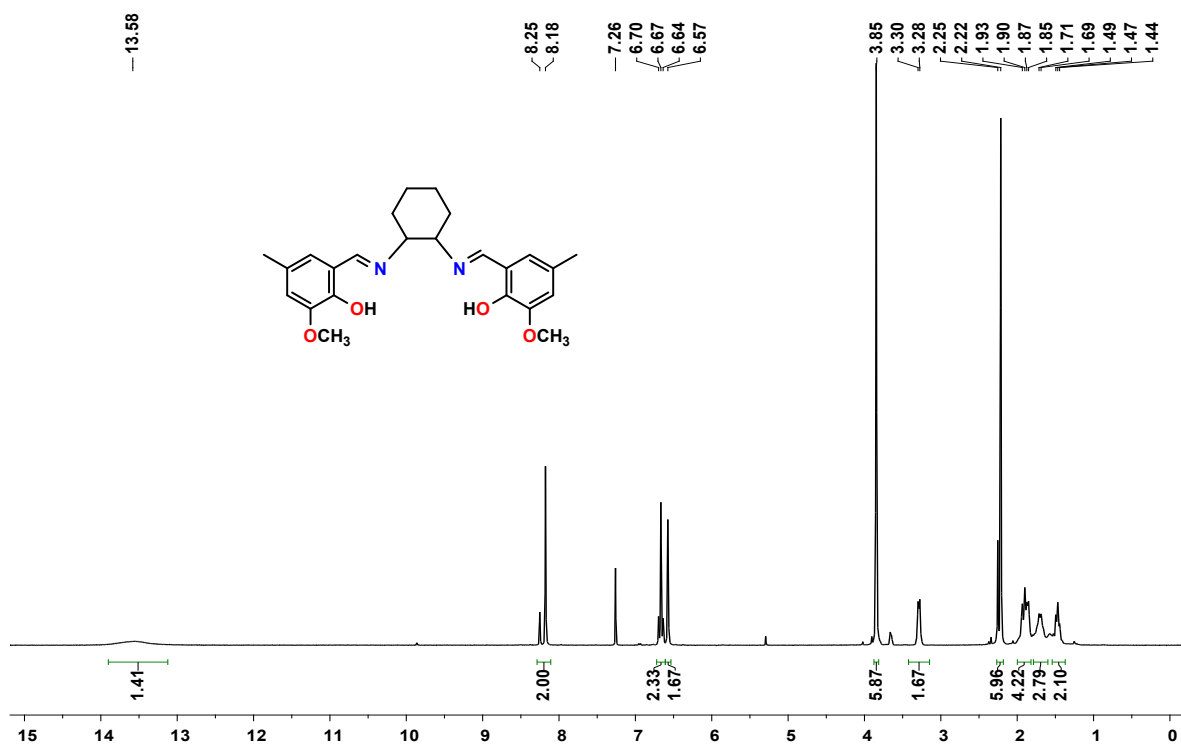

**Fig. S2.** <sup>1</sup>H-NMR of *N,N'*-bis(3-methoxy-5-methylsalicylidene)-1,2-diaminocyclohexane (H<sub>2</sub>L) in CDCl<sub>3</sub> at r.t.

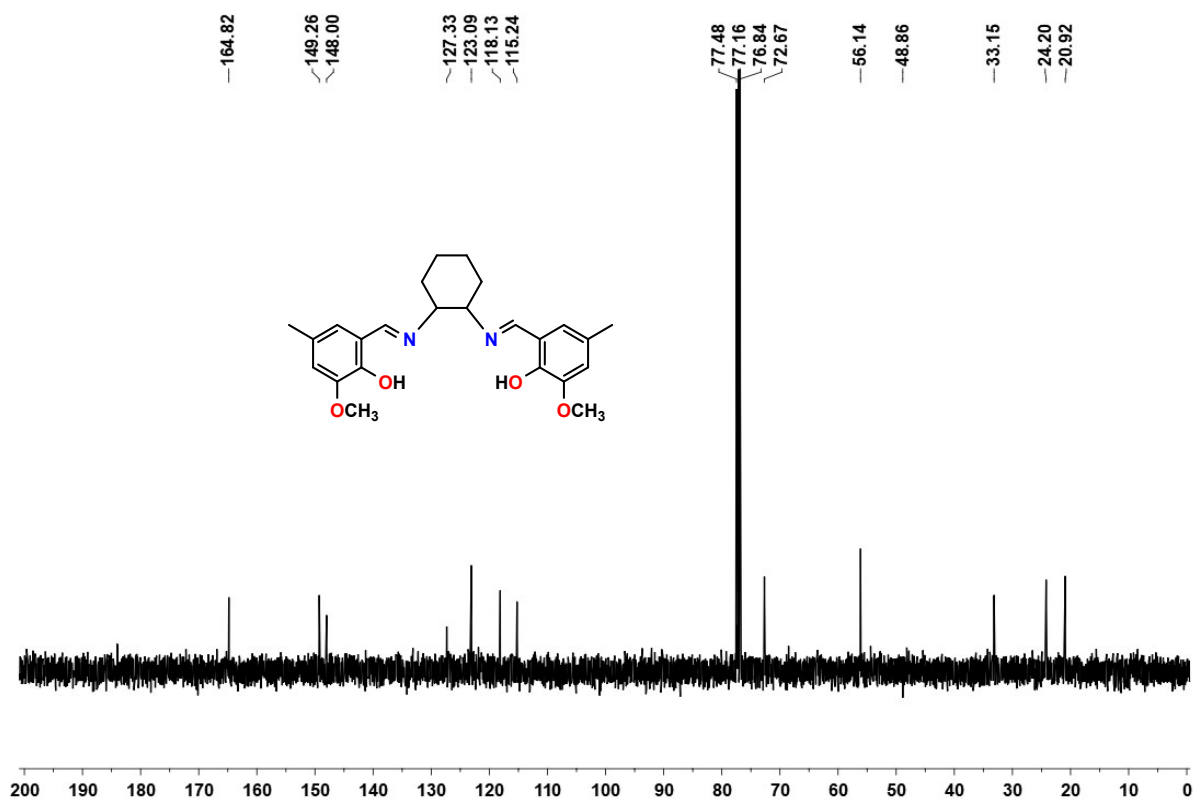

**Fig. S3.** <sup>13</sup>C-NMR of *N,N'*-bis(3-methoxy-5-methylsalicylidene)-1,2-diaminocyclohexane (H<sub>2</sub>L) in CDCl<sub>3</sub> at r.t.

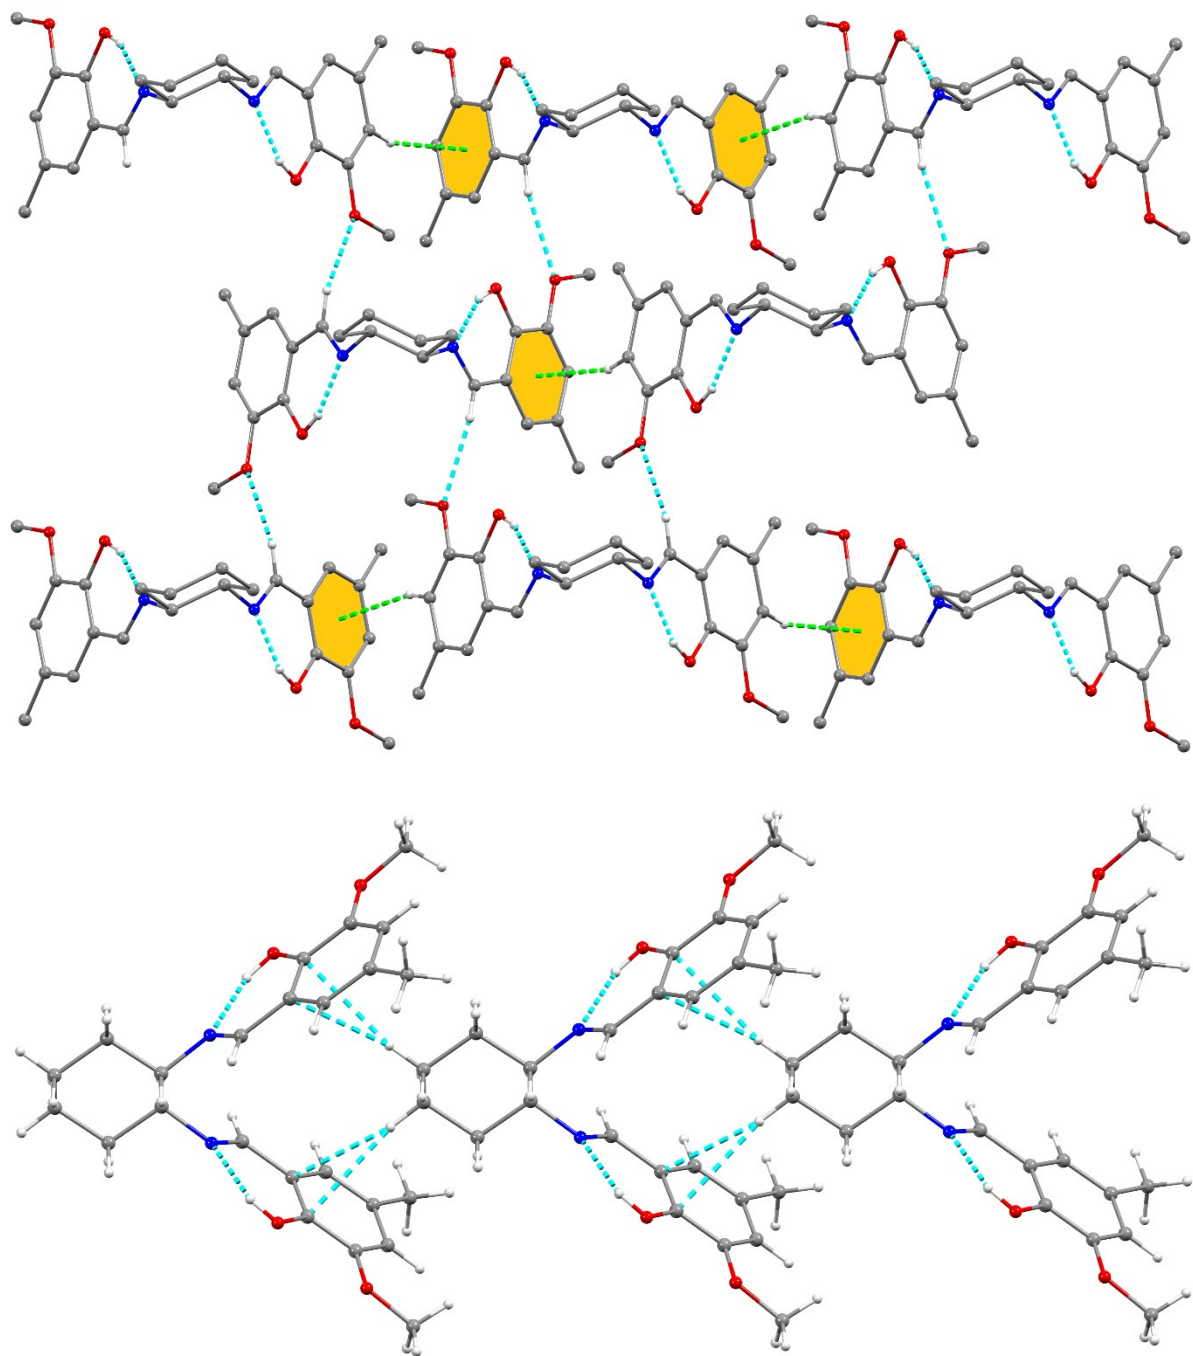

**Fig. S4.** Non-covalent interactions in the Schiff base ligand H<sub>2</sub>L.

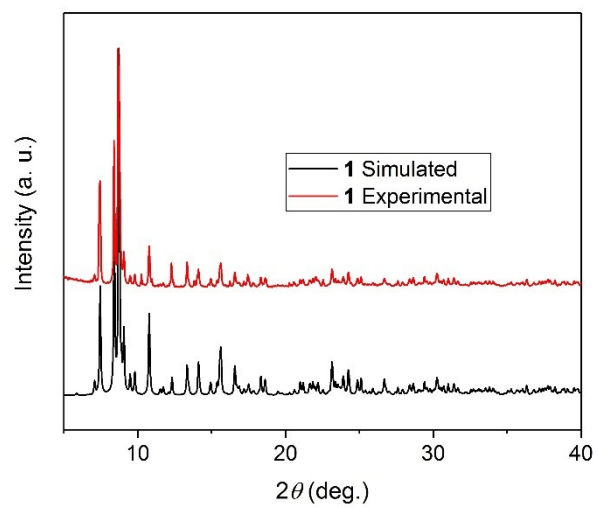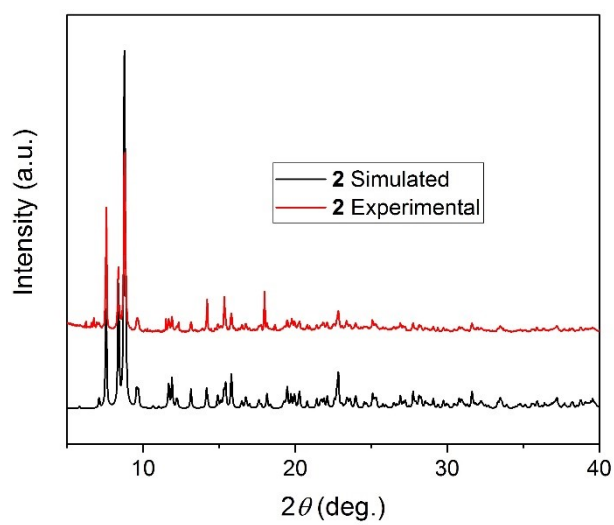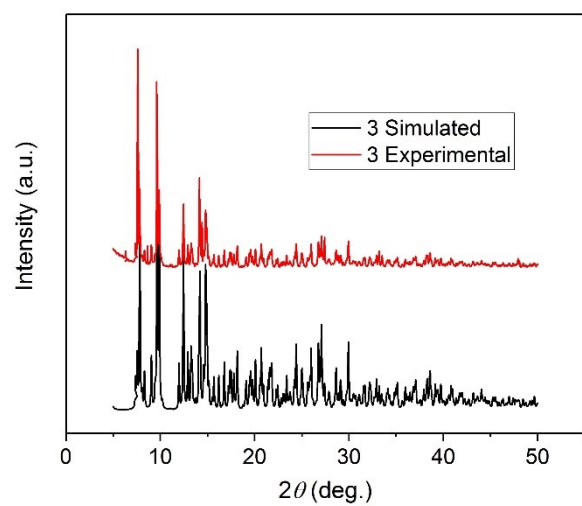

**Fig. S5.** Simulated and experimental PXR D data for 1-3.

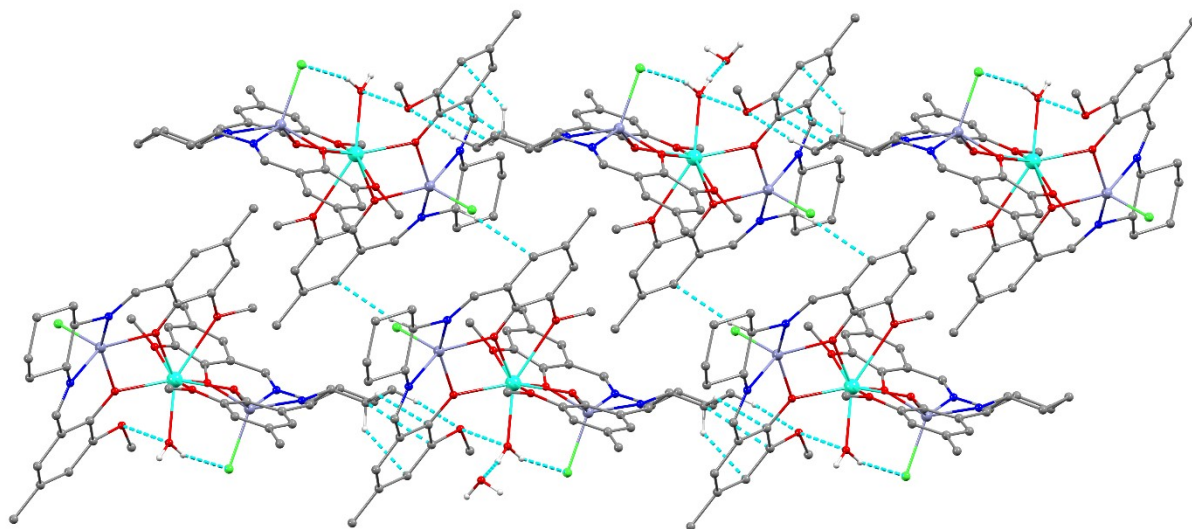

**Fig. S6.** Crystal packing diagram for complex 1.

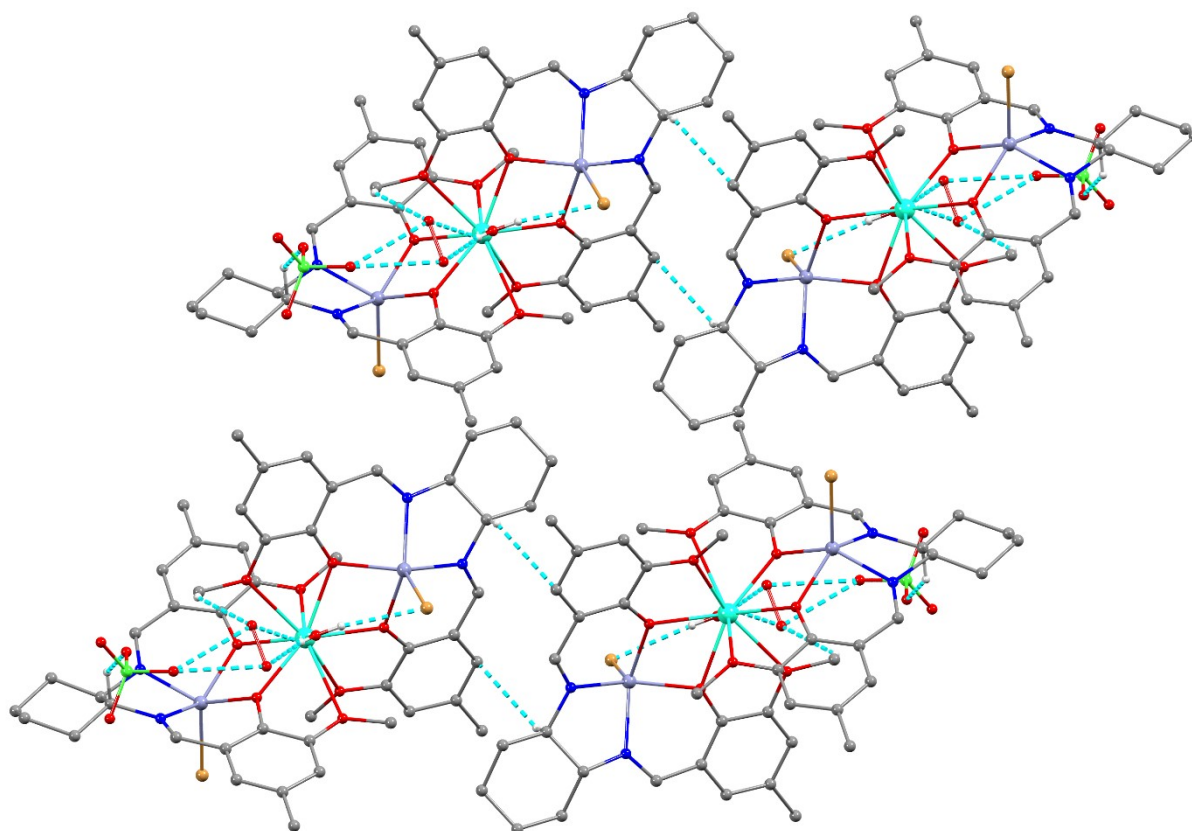

**Fig. S7.** Crystal packing diagram for complex 2.

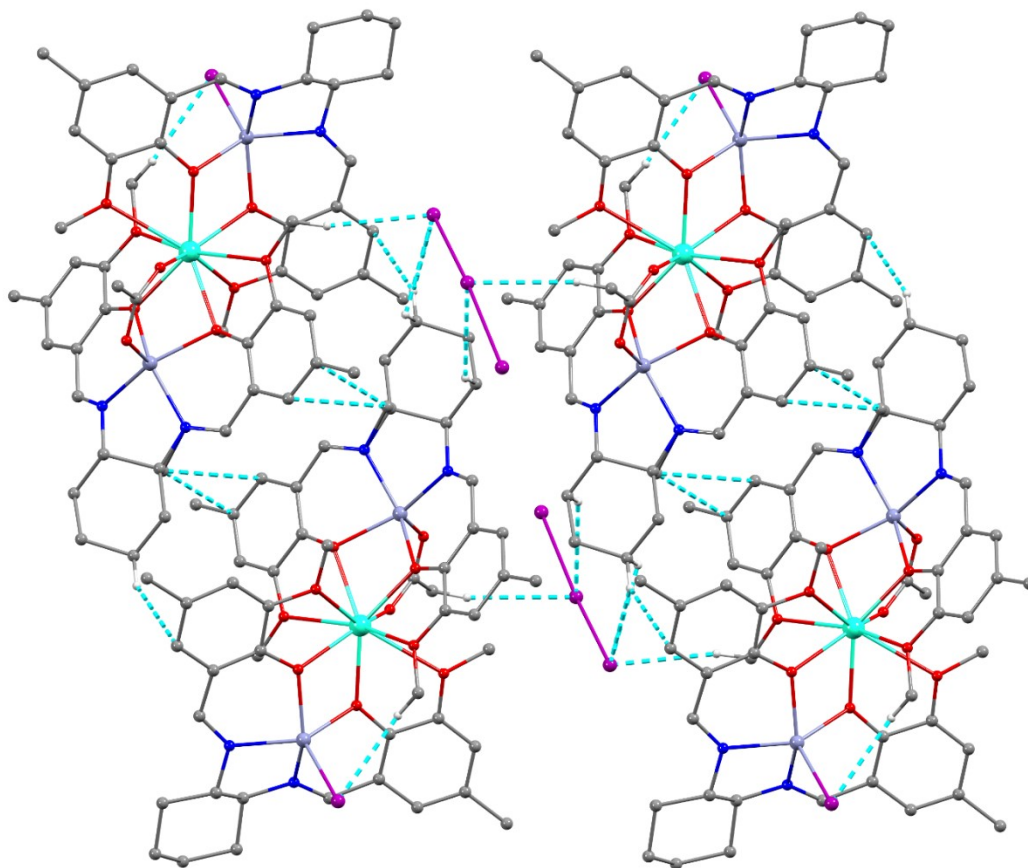

Fig. S8. Crystal packing diagram for complex 3.

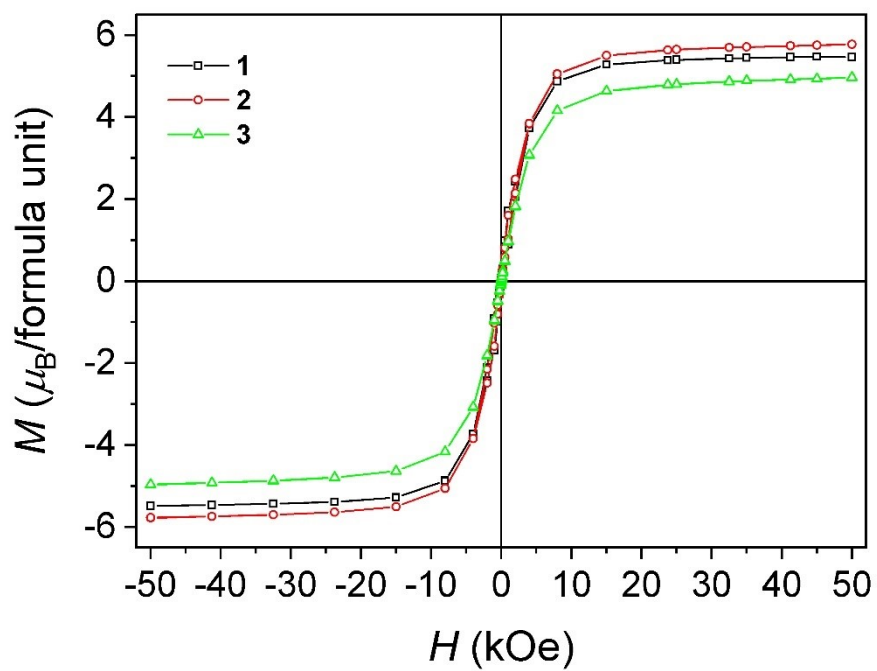

Fig. S9. Isothermal magnetization plots at 2 K for 1-3.



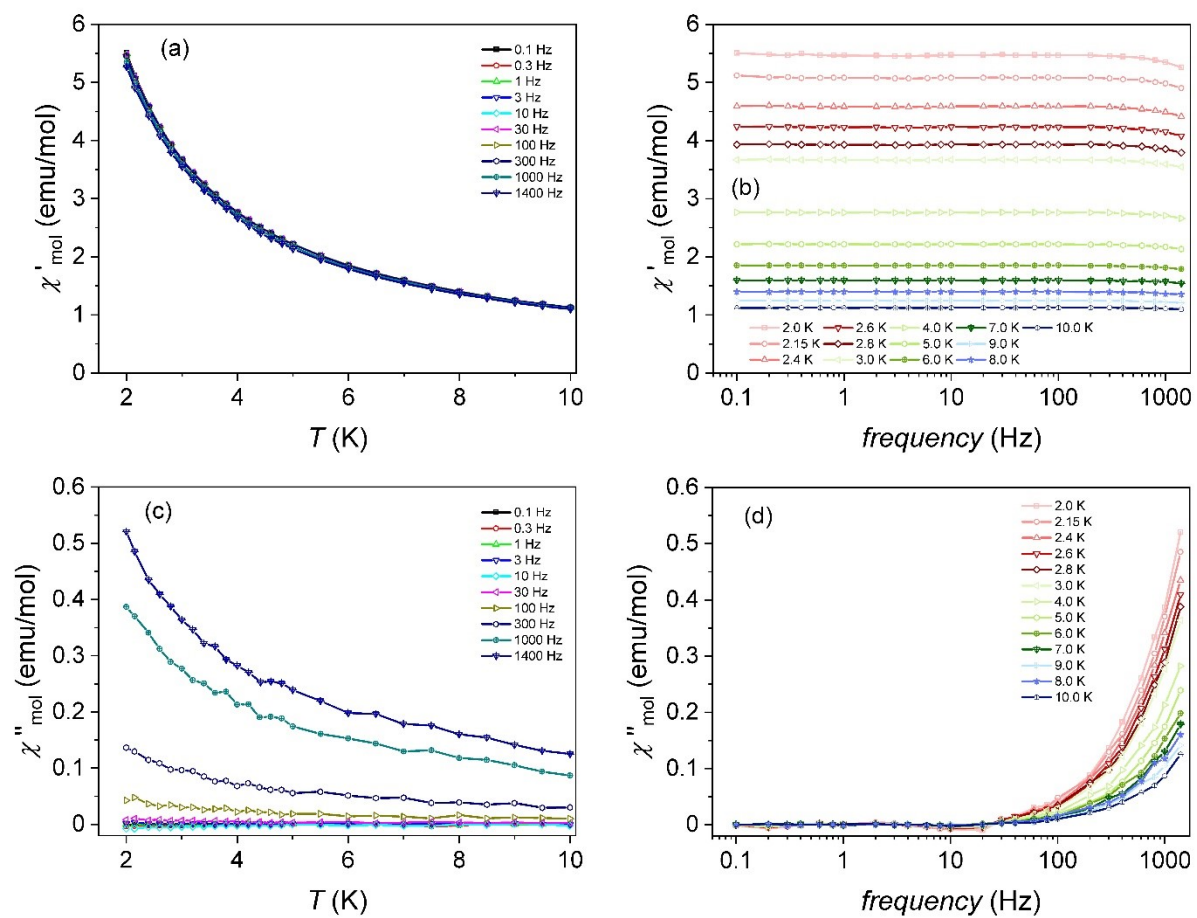

**Fig. S10.** AC data for complex **3** at zero dc field.

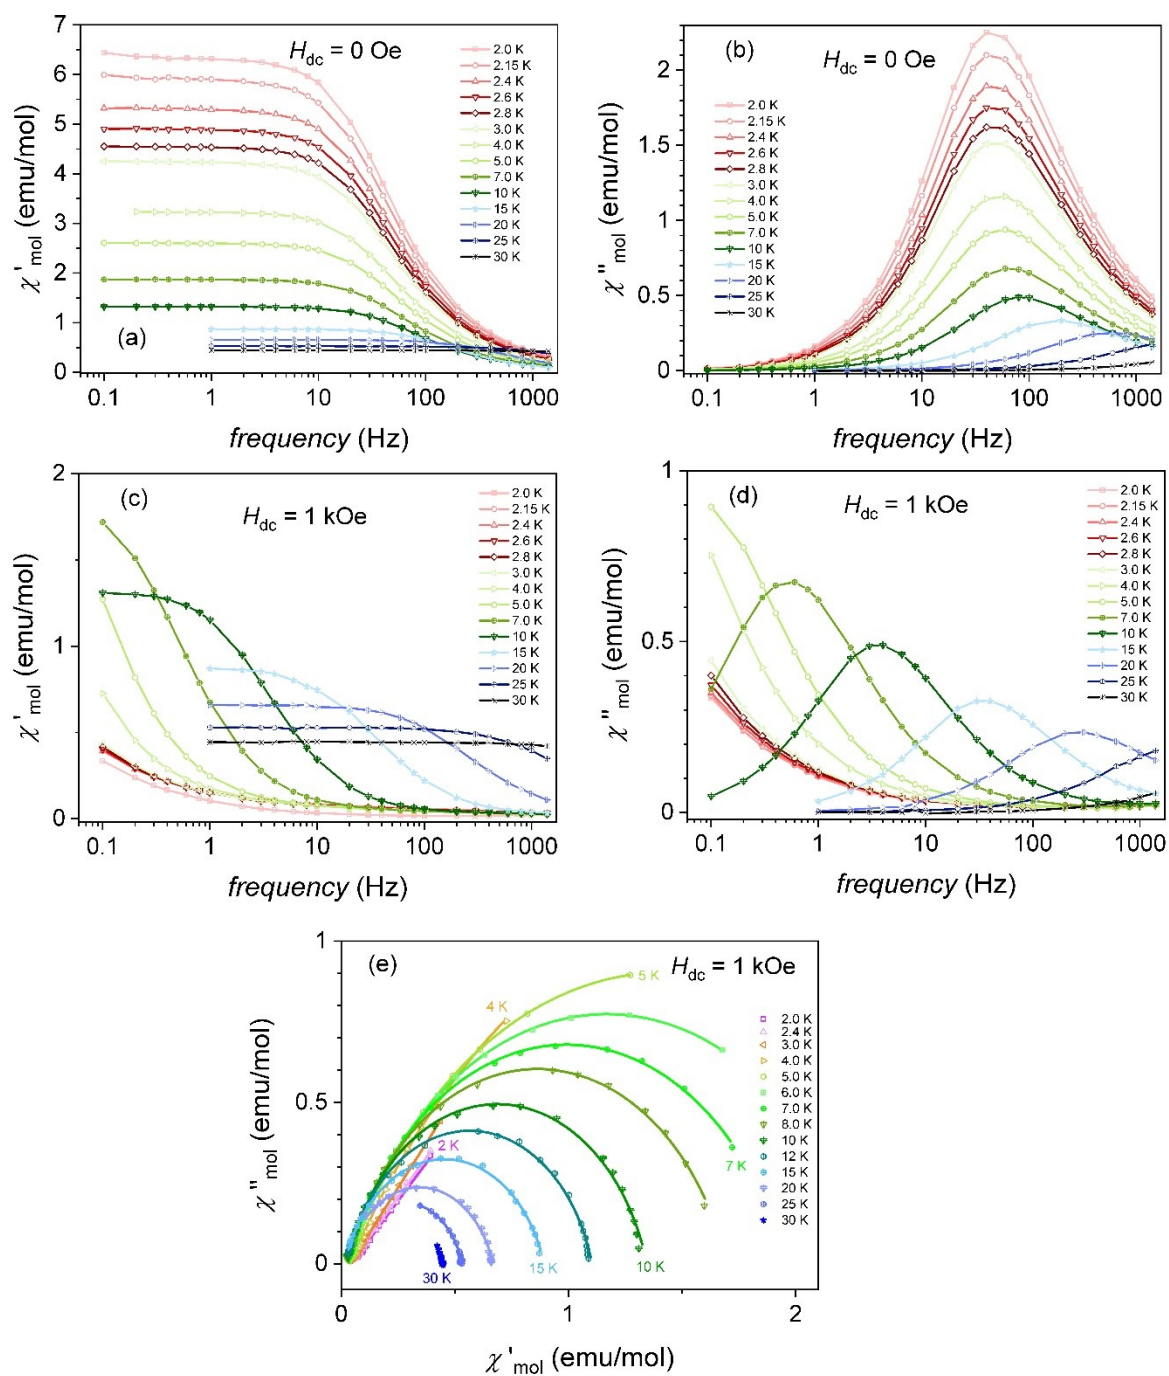

**Fig. S11.** In-phase (a) and out-of-phase (b) ac susceptibility for **1** as a function of ac frequencies in zero dc field and the corresponding plots in a 1000 Oe dc field (c and d) with only selected sets of temperatures for clarity. The Cole-Cole plots at 1000 Oe dc field (e).

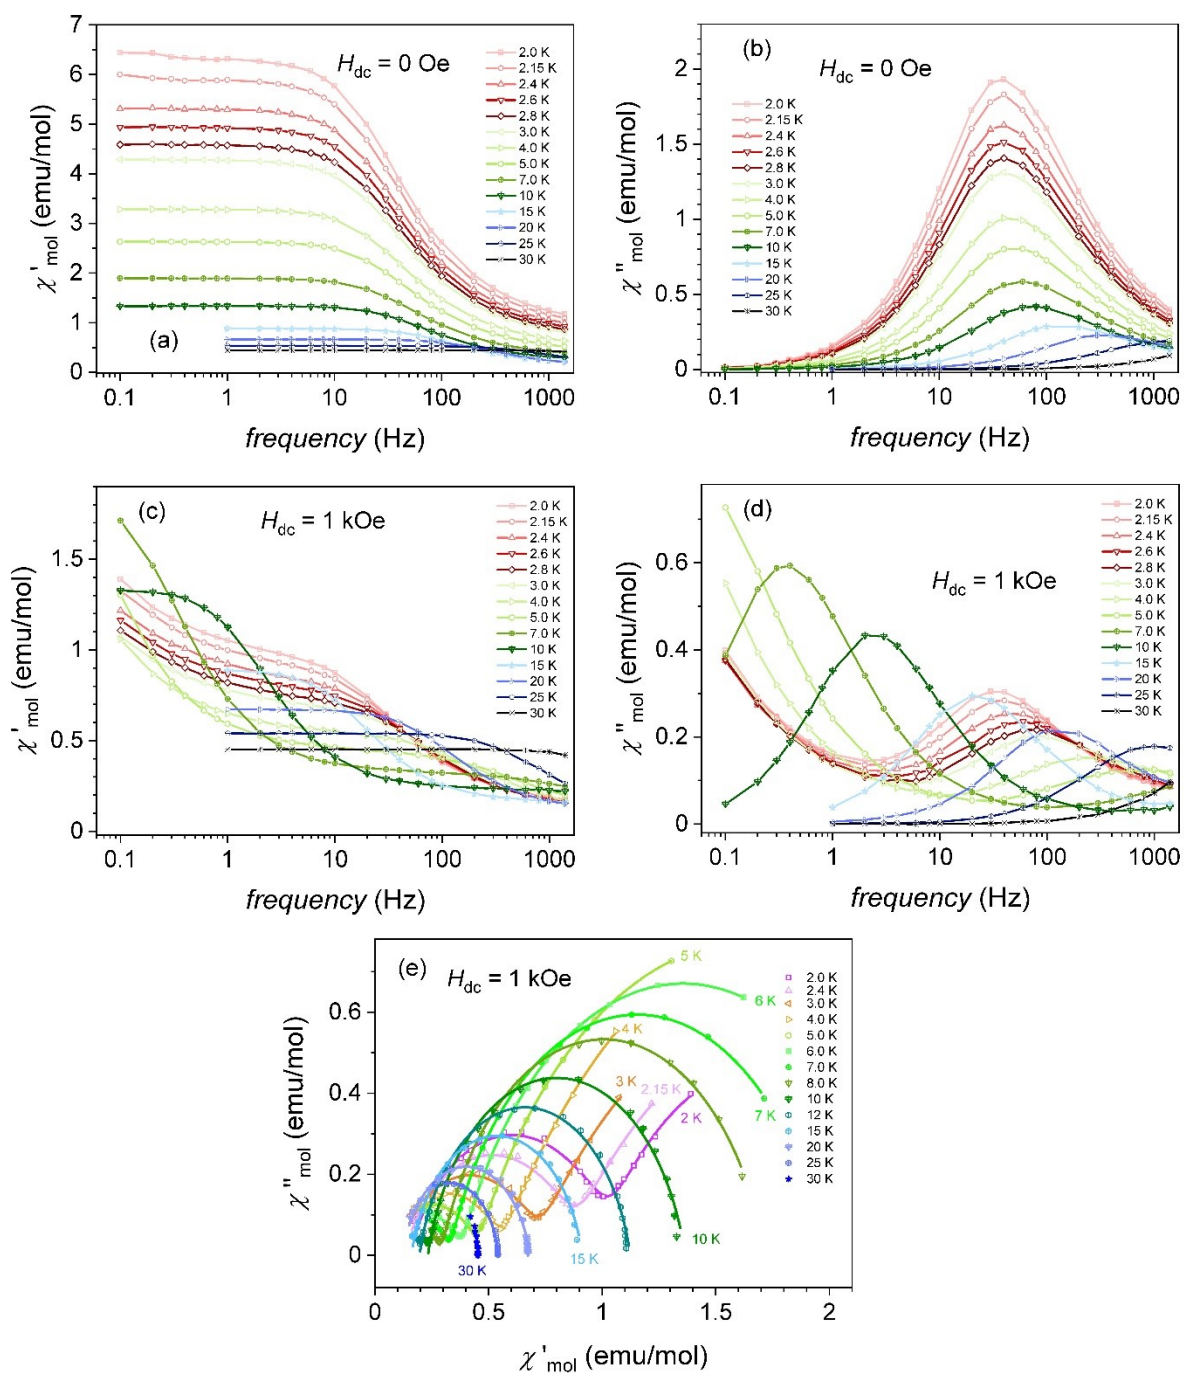

**Fig. S12.** In-phase (a) and out-of-phase (b) ac susceptibility for **2** as a function of ac frequencies in zero dc field and the corresponding plots in a 1000 Oe dc field (c and d) with only selected sets of temperatures for clarity. The Cole-Cole plots at 1000 Oe dc field (e).

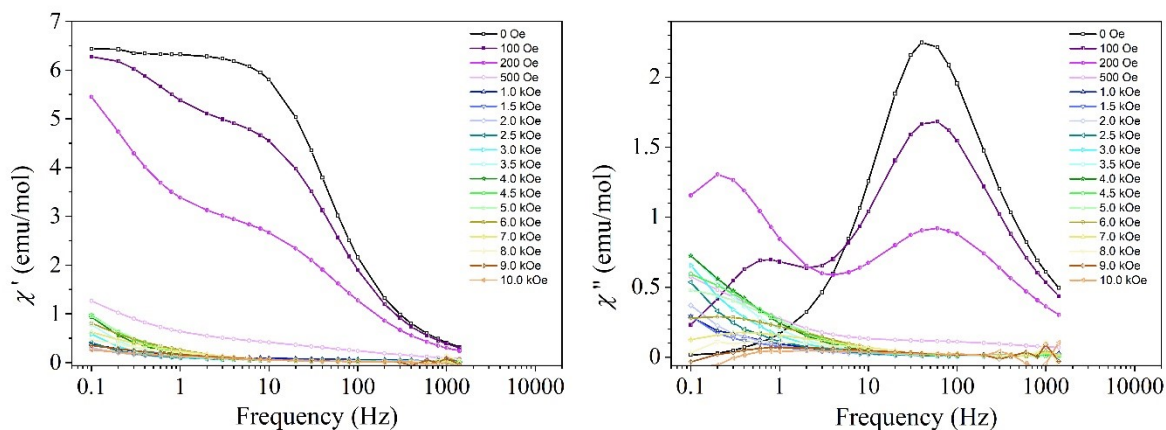

**Fig. S13.** The plots of  $\chi''$  as a function of ac frequency for different applied magnetic fields and at 2 K for **1**.

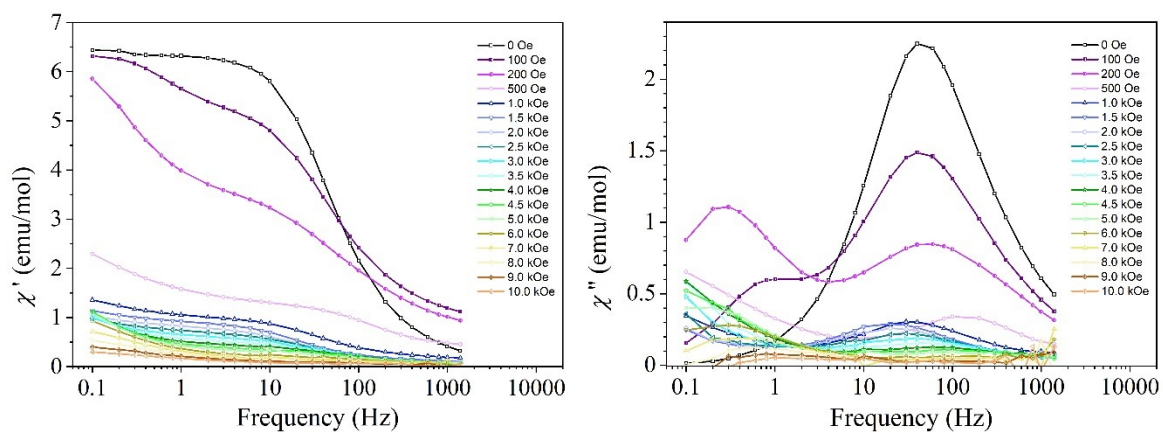

**Fig. S14.** The plots of  $\chi''$  as a function of ac frequency for different applied magnetic fields and at 2 K for **2**.

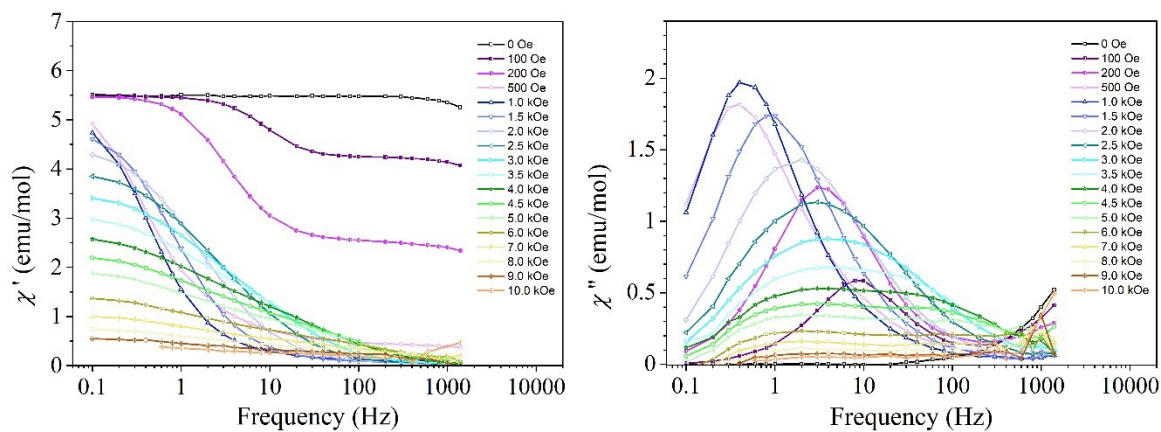

**Fig. S15.** The plots of  $\chi''$  as a function of ac frequency for different applied magnetic fields and at 2 K for **3**.

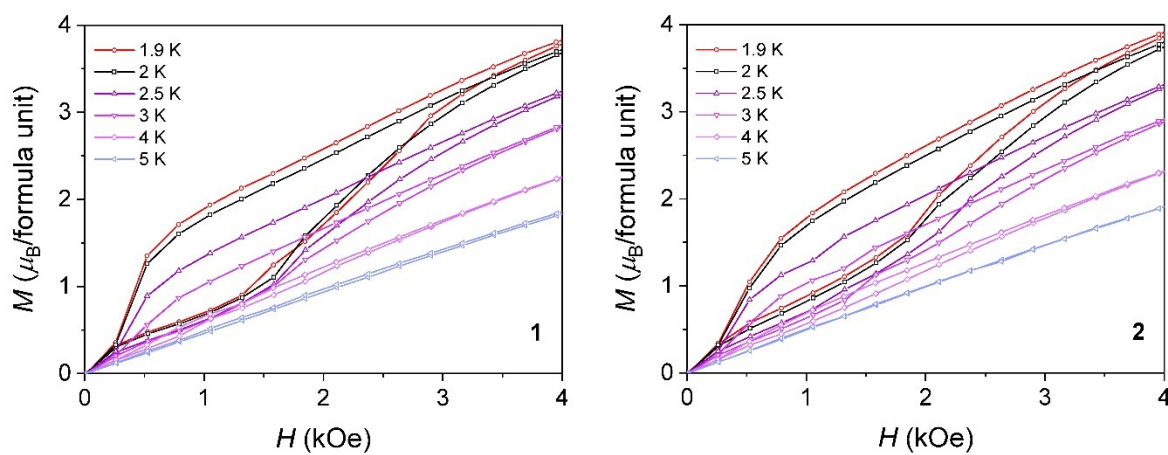

**Fig. S16.** Field dependence of magnetization of **1** (left) and **2** (right) at different temperatures. The magnetization plots in the positive directions have only been shown.

**Table S1.** Crystallographic data and structure refinement parameters of **1–4**.

|                                                               | <b>H<sub>2</sub>L</b>                                                              | <b>1</b>                                                                                            | <b>2</b>                                                                                           | <b>3</b>                                                                                        |
|---------------------------------------------------------------|------------------------------------------------------------------------------------|-----------------------------------------------------------------------------------------------------|----------------------------------------------------------------------------------------------------|-------------------------------------------------------------------------------------------------|
| Empirical formula                                             | C <sub>24</sub> H <sub>30</sub> N <sub>2</sub> O <sub>4</sub>                      | C <sub>48</sub> H <sub>60.05</sub> Cl <sub>3</sub> DyN <sub>4</sub> O <sub>17</sub> Zn <sub>2</sub> | C <sub>48</sub> H <sub>62</sub> Br <sub>2</sub> ClDyN <sub>4</sub> O <sub>17</sub> Zn <sub>2</sub> | C <sub>50</sub> H <sub>67</sub> DyI <sub>4</sub> N <sub>4</sub> O <sub>14</sub> Zn <sub>2</sub> |
| Formula weight                                                | 410.50                                                                             | 1370.68                                                                                             | 1455.52                                                                                            | 1748.91                                                                                         |
| Temperature/K                                                 | 150.00                                                                             | 150.00                                                                                              | 150.00                                                                                             | 150.00                                                                                          |
| Crystal system                                                | orthorhombic                                                                       | monoclinic                                                                                          | monoclinic                                                                                         | triclinic                                                                                       |
| Space group                                                   | <i>Fdd2</i>                                                                        | <i>P2<sub>1</sub>/c</i>                                                                             | <i>P2<sub>1</sub>/c</i>                                                                            | <i>P<math>\bar{1}</math></i>                                                                    |
| <i>a</i> /Å                                                   | 20.8442(10)                                                                        | 12.5292(15)                                                                                         | 12.5327(7)                                                                                         | 12.5913(11)                                                                                     |
| <i>b</i> /Å                                                   | 25.538(2)                                                                          | 19.500(2)                                                                                           | 19.9571(11)                                                                                        | 13.6488(12)                                                                                     |
| <i>c</i> /Å                                                   | 8.7128(5)                                                                          | 23.808(3)                                                                                           | 23.5431(12)                                                                                        | 19.5604(17)                                                                                     |
| $\alpha$ /°                                                   | 90                                                                                 | 90                                                                                                  | 90                                                                                                 | 103.066(3)                                                                                      |
| $\beta$ /°                                                    | 90                                                                                 | 95.720(4)                                                                                           | 97.405(2)                                                                                          | 94.469(3)                                                                                       |
| $\gamma$ /°                                                   | 90                                                                                 | 90                                                                                                  | 90                                                                                                 | 114.008(3)                                                                                      |
| Volume/Å <sup>3</sup>                                         | 4637.9(5)                                                                          | 5787.8(12)                                                                                          | 5839.4(5)                                                                                          | 2936.2(5)                                                                                       |
| <i>Z</i>                                                      | 8                                                                                  | 4                                                                                                   | 4                                                                                                  | 2                                                                                               |
| $\rho_{\text{calc}}$ g/cm <sup>3</sup>                        | 1.176                                                                              | 1.573                                                                                               | 1.656                                                                                              | 1.978                                                                                           |
| $\mu$ /mm <sup>-1</sup>                                       | 0.080                                                                              | 2.307                                                                                               | 3.563                                                                                              | 4.236                                                                                           |
| <i>F</i> (000)                                                | 1760.0                                                                             | 2780.0                                                                                              | 2908.0                                                                                             | 1690.0                                                                                          |
| 2 $\theta$ range for data collection/°                        | 5.046 to 54.242                                                                    | 5.304 to 60.452                                                                                     | 4.912 to 61.128                                                                                    | 4.532 to 58.506                                                                                 |
| Reflections collected                                         | 25447                                                                              | 234637                                                                                              | 295248                                                                                             | 189984                                                                                          |
| Independent reflections                                       | 2548<br>[ <i>R</i> <sub>int</sub> = 0.0215,<br><i>R</i> <sub>sigma</sub> = 0.0097] | 12768<br>[ <i>R</i> <sub>int</sub> = 0.0403, <i>R</i> <sub>sigma</sub> =<br>0.0129]                 | 17826<br>[ <i>R</i> <sub>int</sub> = 0.0382, <i>R</i> <sub>sigma</sub> =<br>0.0155]                | 15903<br>[ <i>R</i> <sub>int</sub> = 0.0345, <i>R</i> <sub>sigma</sub> =<br>0.0159]             |
| Data/restraints/parameter                                     | 2548/1/146                                                                         | 12766/76/703                                                                                        | 17826/123/741                                                                                      | 15903/63/703                                                                                    |
| Goodness-of-fit on <i>F</i> <sup>2</sup>                      | 1.032                                                                              | 1.123                                                                                               | 1.189                                                                                              | 1.067                                                                                           |
| Final <i>R</i> indexes [ <i>I</i> >= 2 $\sigma$ ( <i>I</i> )] | <i>R</i> <sub>1</sub> = 0.0304,<br><i>wR</i> <sub>2</sub> = 0.0861                 | <i>R</i> <sub>1</sub> = 0.0513,<br><i>wR</i> <sub>2</sub> = 0.1187                                  | <i>R</i> <sub>1</sub> = 0.0474,<br><i>wR</i> <sub>2</sub> = 0.1184                                 | <i>R</i> <sub>1</sub> = 0.0441,<br><i>wR</i> <sub>2</sub> = 0.1152                              |
| Final <i>R</i> indexes [all data]                             | <i>R</i> <sub>1</sub> = 0.0312,<br><i>wR</i> <sub>2</sub> = 0.0870                 | <i>R</i> <sub>1</sub> = 0.0561,<br><i>wR</i> <sub>2</sub> = 0.1228                                  | <i>R</i> <sub>1</sub> = 0.0581, <i>wR</i> <sub>2</sub> =<br>0.1275                                 | <i>R</i> <sub>1</sub> = 0.0515,<br><i>wR</i> <sub>2</sub> = 0.1232                              |
| Largest diff. peak/hole / e Å <sup>-3</sup>                   | 0.23/-0.15                                                                         | 1.46/-1.58                                                                                          | 1.38/-1.17                                                                                         | 1.94/-1.96                                                                                      |

**Table S2.** Selected bond parameters around the metal centres in **1–3**.

| <b>Bonds</b>      | <b>1</b>  | <b>2</b>  | <b>3</b>   |
|-------------------|-----------|-----------|------------|
| Dy–O1 (phenoxo)   | 2.224(3)  | 2.321(3)  | 2.314(4)   |
| Dy –O2 (methoxy)  | 2.491(3)  | 2.608(3)  | 2.645(4)   |
| Dy –O3 (phenoxo)  | 2.407(3)  | 2.275(3)  | 2.291(4)   |
| Dy –O4 (methoxy)  | 2.388(3)  | 2.772(3)  | 2.723(4)   |
| Dy –O5(phenoxo)   | 2.421(4)  | 2.303(3)  | 2.289(4)   |
| Dy –O6 (methoxy)  | 2.896(4)  | 2.538(3)  | 2.572(4)   |
| Dy –O7 (phenoxo)  | 2.248(3)  | 2.307(3)  | 2.347(4)   |
| Dy –O8 (methoxy)  | 2.816(4)  | 2.578(3)  | 2.600(4)   |
| Dy –O9 (aqua)     | 2.375(4)  | 2.397(3)  | –          |
| Dy –O10 (acetate) | –         | –         | 2.327(4)   |
| Dy···Zn1          | 3.4302(7) | 3.5549(5) | 3.5516(11) |
| Dy···Zn2          | 3.5295(7) | 3.4532(5) | 3.302(12)  |
|                   |           |           |            |

**Table S3.** Shape analysis of the structure **1-3**.

| <b>Label</b> | <b>Shape</b>                       | <b>Symmetry</b> | <b>1</b>     | <b>2</b>     | <b>3</b>     |
|--------------|------------------------------------|-----------------|--------------|--------------|--------------|
| EP-9         | Enneagon                           | D <sub>9h</sub> | 32.617       | 36.181       | 35.493       |
| OPY-9        | Octagonal pyramid                  | C <sub>8v</sub> | 19.977       | 20.848       | 22.164       |
| HBPY-9       | Heptagonal bipyramid               | D <sub>7h</sub> | 16.612       | 17.104       | 15.058       |
| JTC-9        | Johnson triangular cupola J3       | C <sub>3v</sub> | 16.094       | 14.079       | 13.136       |
| JCCU-9       | Capped cube J8                     | C <sub>4v</sub> | 8.098        | 7.515        | 7.275        |
| CCU-9        | Spherical-relaxed capped cube      | C <sub>4v</sub> | 7.827        | 7.000        | 6.866        |
| JCSAPR-9     | Capped square antiprism J10        | C <sub>4v</sub> | 3.935        | 3.346        | 3.081        |
| CSAPR-9      | Spherical capped square antiprism  | C <sub>4v</sub> | 3.743        | 2.763        | 2.879        |
| JTCTPR-9     | Tricapped trigonal prism J51       | D <sub>3h</sub> | 5.307        | 3.833        | 4.358        |
| TCTPR-9      | Spherical tricapped trigonal prism | D <sub>3h</sub> | <b>2.758</b> | <b>2.167</b> | 2.792        |
| JTDIC-9      | Tridiminished icosahedron J63      | C <sub>3v</sub> | 9.735        | 9.925        | 9.417        |
| HH-9         | Hula-hoop                          | C <sub>2v</sub> | 11.180       | 10.270       | 10.736       |
| MFF-9        | Muffin                             | C <sub>s</sub>  | 3.580        | 2.822        | <b>2.194</b> |

**Table S4.** Relaxation fitting parameters from the least-square fitting of the Cole-Cole plots of **1** by the single-component generalized Debye model at zero and 1000 Oe dc fields.

| $T$<br>(K) | $\chi_s$<br>(emu/mol) | $\Delta\chi$<br>(emu/mol) | $\tau$ (s) | $\alpha$ | $\chi_s$<br>(emu/mol) | $\Delta\chi$<br>(emu/mol) | $\tau$ (s) | $\alpha$ |
|------------|-----------------------|---------------------------|------------|----------|-----------------------|---------------------------|------------|----------|
|            | $H_{dc} = 0$ Oe       |                           |            |          | $H_{dc} = 1$ kOe      |                           |            |          |
| 2          | 0.26279               | 6.15952                   | 0.00302    | 0.185    | 0.04401               | 33502.77                  | 1.75E+10   | 0.51743  |
| 2.15       | 0.24366               | 5.74847                   | 0.00299    | 0.18645  | 0.04218               | 38604.74                  | 1.73E+10   | 0.5114   |
| 2.4        | 0.22357               | 5.15458                   | 0.00292    | 0.1832   | 0.04003               | 40280.48                  | 1.30E+10   | 0.50468  |
| 2.6        | 0.2105                | 4.74854                   | 0.00287    | 0.18165  | 0.0393                | 273712.2                  | 3.18E+11   | 0.49353  |
| 2.8        | 0.19633               | 4.40567                   | 0.00282    | 0.18201  | 0.0382                | 45177.1                   | 4.97E+09   | 0.48205  |
| 3          | 0.18152               | 4.11301                   | 0.00278    | 0.18255  | 0.03804               | 15123.69                  | 2.81E+08   | 0.46537  |
| 3.2        | 0.17188               | 3.86762                   | 0.00274    | 0.18306  | 0.03694               | 978.2859                  | 1025221    | 0.45238  |
| 3.4        | 0.16389               | 3.66707                   | 0.0027     | 0.18251  | 0.03762               | 16.53743                  | 349.5559   | 0.42414  |
| 3.6        | 0.15625               | 3.49284                   | 0.00265    | 0.18309  | 0.03885               | 8.37992                   | 68.43573   | 0.39505  |
| 3.8        | 0.1524                | 3.29965                   | 0.0026     | 0.18065  | 0.03966               | 5.6118                    | 24.03877   | 0.36527  |
| 4          | 0.14274               | 3.13232                   | 0.00256    | 0.18175  | 0.03974               | 4.33411                   | 11.45507   | 0.33752  |
| 4.2        | 0.13809               | 2.98067                   | 0.00253    | 0.18107  | 0.03998               | 3.77909                   | 7.1154     | 0.31715  |
| 4.4        | 0.13043               | 2.85412                   | 0.0025     | 0.18272  | 0.03929               | 3.37786                   | 4.74812    | 0.30001  |
| 4.6        | 0.13151               | 2.72744                   | 0.00245    | 0.1777   | 0.03822               | 3.13034                   | 3.43647    | 0.28711  |
| 4.8        | 0.12638               | 2.61593                   | 0.00242    | 0.17812  | 0.03712               | 2.93857                   | 2.57921    | 0.27674  |
| 5          | 0.12093               | 2.51317                   | 0.00238    | 0.17774  | 0.03679               | 2.78259                   | 1.98199    | 0.26655  |
| 5.5        | 0.11252               | 2.28407                   | 0.00229    | 0.17723  | 0.03468               | 2.49775                   | 1.12016    | 0.25083  |
| 6          | 0.10461               | 2.09275                   | 0.0022     | 0.17547  | 0.03278               | 2.26904                   | 0.67444    | 0.2379   |
| 6.5        | 0.10056               | 1.93374                   | 0.00213    | 0.17374  | 0.03143               | 2.08343                   | 0.43218    | 0.22681  |
| 7          | 0.09287               | 1.79918                   | 0.00205    | 0.17253  | 0.03017               | 1.92195                   | 0.28584    | 0.21674  |
| 7.5        | 0.08866               | 1.67919                   | 0.00198    | 0.1713   | 0.02929               | 1.78879                   | 0.19568    | 0.20902  |
| 8          | 0.08527               | 1.57433                   | 0.0019     | 0.16831  | 0.02854               | 1.66816                   | 0.13692    | 0.20229  |
| 8.5        | 0.08006               | 1.4849                    | 0.00182    | 0.16824  | 0.02824               | 1.56563                   | 0.09843    | 0.19562  |
| 9          | 0.07768               | 1.40368                   | 0.00175    | 0.16508  | 0.02812               | 1.47444                   | 0.07225    | 0.19024  |
| 9.5        | 0.07451               | 1.3302                    | 0.00167    | 0.16213  | 0.02744               | 1.39386                   | 0.05396    | 0.18538  |
| 10         | 0.0722                | 1.26259                   | 0.00159    | 0.15831  | 0.0268                | 1.31828                   | 0.04059    | 0.18012  |
| 10.5       | 0.0505                | 1.18588                   | 0.00144    | 0.15531  | 0.02831               | 1.24488                   | 0.03132    | 0.17156  |
| 11         | 0.06705               | 1.1326                    | 0.00137    | 0.15346  | 0.02612               | 1.188                     | 0.02405    | 0.17771  |
| 11.5       | 0.06442               | 1.08272                   | 0.0013     | 0.14886  | 0.02538               | 1.13623                   | 0.01905    | 0.17588  |
| 12         | 0.06131               | 1.03075                   | 0.00121    | 0.14607  | 0.02572               | 1.07727                   | 0.01413    | 0.16815  |
| 12.5       | 0.05857               | 0.99168                   | 0.00114    | 0.14279  | 0.02373               | 1.03657                   | 0.01156    | 0.17439  |
| 13         | 0.05578               | 0.95561                   | 0.00107    | 0.14134  | 0.0249                | 0.99537                   | 0.00931    | 0.16783  |
| 13.5       | 0.05282               | 0.92103                   | 9.99E-04   | 0.13838  | 0.02271               | 0.9623                    | 0.00766    | 0.17209  |
| 14         | 0.05057               | 0.88902                   | 9.26E-04   | 0.13638  | 0.02309               | 0.92509                   | 0.00616    | 0.16848  |
| 14.5       | 0.04883               | 0.85873                   | 8.57E-04   | 0.13402  | 0.02014               | 0.89498                   | 0.00503    | 0.17604  |
| 15         | 0.04229               | 0.83923                   | 7.88E-04   | 0.13934  | 0.01573               | 0.87621                   | 0.00417    | 0.18917  |
| 15.5       | 0.0407                | 0.81263                   | 7.21E-04   | 0.13766  | 0.01772               | 0.84922                   | 0.0034     | 0.18301  |
| 16         | 0.03802               | 0.78847                   | 6.56E-04   | 0.13716  | 0.01975               | 0.82017                   | 0.00277    | 0.17813  |



|      |         |         |          |         |         |         |          |         |
|------|---------|---------|----------|---------|---------|---------|----------|---------|
| 16.5 | 0.03732 | 0.76421 | 5.95E-04 | 0.13514 | 0.01771 | 0.7946  | 0.00227  | 0.18425 |
| 17   | 0.03532 | 0.74285 | 5.36E-04 | 0.13497 | 0.01729 | 0.77069 | 0.00187  | 0.18997 |
| 17.5 | 0.03407 | 0.72184 | 4.82E-04 | 0.13532 | 0.01789 | 0.74962 | 0.00152  | 0.18909 |
| 18   | 0.03211 | 0.70316 | 4.31E-04 | 0.13564 | 0.01787 | 0.72796 | 0.00125  | 0.19177 |
| 18.5 | 0.03194 | 0.68274 | 3.82E-04 | 0.13702 | 0.01917 | 0.70353 | 0.00101  | 0.19042 |
| 19   | 0.02962 | 0.66671 | 3.38E-04 | 0.13731 | 0.01828 | 0.68496 | 8.26E-04 | 0.19517 |
| 19.5 | 0.03054 | 0.64745 | 2.99E-04 | 0.13825 | 0.01933 | 0.66668 | 6.77E-04 | 0.19764 |
| 20   | 0.0328  | 0.62834 | 2.64E-04 | 0.13757 | 0.02101 | 0.64677 | 5.52E-04 | 0.19461 |
| 20.5 | 0.02986 | 0.61524 | 2.30E-04 | 0.14189 | 0.02202 | 0.62783 | 4.50E-04 | 0.19585 |
| 21   | 0.02981 | 0.59965 | 2.01E-04 | 0.14224 | 0.02547 | 0.61003 | 3.70E-04 | 0.19702 |
| 21.5 | 0.03908 | 0.57546 | 1.79E-04 | 0.13737 | 0.02669 | 0.59247 | 3.03E-04 | 0.19484 |
| 22   | 0.03772 | 0.56289 | 1.54E-04 | 0.1419  | 0.0269  | 0.57893 | 2.48E-04 | 0.19529 |
| 22.5 | 0.03416 | 0.55337 | 1.33E-04 | 0.14354 | 0.0379  | 0.55268 | 2.09E-04 | 0.185   |
| 23   | 0.03494 | 0.53956 | 1.15E-04 | 0.1435  | 0.04029 | 0.53652 | 1.71E-04 | 0.1802  |
| 23.5 | 0.04168 | 0.52038 | 1.02E-04 | 0.13802 | 0.04183 | 0.52427 | 1.42E-04 | 0.17986 |
| 24   | 0.04308 | 0.50784 | 8.78E-05 | 0.1383  | 0.04243 | 0.51222 | 1.18E-04 | 0.17893 |
| 24.5 | 0.04339 | 0.49637 | 7.48E-05 | 0.14078 | 0.0436  | 0.49885 | 9.56E-05 | 0.17745 |
| 25   | 0.04316 | 0.4858  | 6.46E-05 | 0.13548 | 0.03685 | 0.49393 | 7.74E-05 | 0.17059 |
| 25.5 | 0.04857 | 0.47023 | 5.56E-05 | 0.13645 | 0.04914 | 0.47045 | 6.60E-05 | 0.15795 |
| 26   | 0.02953 | 0.47917 | 4.47E-05 | 0.14116 | 0.05549 | 0.45503 | 5.62E-05 | 0.15558 |
| 26.5 | 0.0461  | 0.45352 | 3.97E-05 | 0.14014 | 0.03793 | 0.46286 | 4.45E-05 | 0.15468 |
| 27   | 0.04024 | 0.45027 | 3.28E-05 | 0.14149 | 0.01929 | 0.47327 | 3.39E-05 | 0.16605 |
| 27.5 | 0.0306  | 0.45121 | 2.69E-05 | 0.14862 | 0.04624 | 0.4376  | 3.08E-05 | 0.15701 |
| 28   | 0.05536 | 0.41833 | 2.56E-05 | 0.12871 | 0       | 0.4753  | 2.18E-05 | 0.16909 |
| 28.5 | 0       | 0.46567 | 1.81E-05 | 0.14626 | 0.04233 | 0.42429 | 2.12E-05 | 0.1518  |
| 29   | 0       | 0.45843 | 1.52E-05 | 0.15063 | 0.02039 | 0.43856 | 1.67E-05 | 0.15791 |
| 29.5 | 0.06771 | 0.38364 | 1.57E-05 | 0.14903 | 0.05736 | 0.39312 | 1.61E-05 | 0.13653 |
| 30   | 0.10219 | 0.34147 | 1.72E-05 | 0.10766 | 0.05134 | 0.39334 | 1.33E-05 | 0.15385 |

**Table S5.** Relaxation fitting parameters from the least-square fitting of the Cole-Cole plots of **2** by the single-component generalized Debye model at zero and 1000 Oe dc fields.

| $T$ (K) | $\chi_s$<br>(emu/mol) | $\Delta\chi$<br>(emu/mol) | $\tau$ (s) | $\alpha$ | $\chi_s$<br>(emu/mol) | $\Delta\chi$<br>(emu/mol) | $\tau$ (s) | $\alpha$ |
|---------|-----------------------|---------------------------|------------|----------|-----------------------|---------------------------|------------|----------|
|         | $H_{dc} = 0$ Oe       |                           |            |          | $H_{dc} = 1$ kOe (LF) |                           |            |          |
| 2       | 1.12328               | 5.29912                   | 0.0035     | 0.19473  | 0.15039               | 1.41777                   | 4.31932    | 0.26265  |
| 2.15    | 1.05742               | 4.91941                   | 0.00345    | 0.18913  | 0.14331               | 1.51776                   | 5.05189    | 0.29327  |
| 2.4     | 0.96128               | 4.41359                   | 0.00338    | 0.18734  | 0.12732               | 1.99943                   | 9.84324    | 0.3474   |
| 2.6     | 0.89186               | 4.10256                   | 0.00331    | 0.18629  | 0.1174                | 1.90336                   | 8.67553    | 0.34025  |
| 2.8     | 0.83387               | 3.80594                   | 0.00326    | 0.1858   | 0.10723               | 2.28281                   | 12.78964   | 0.36759  |
| 3       | 0.77924               | 3.55184                   | 0.00319    | 0.18559  | 0.09666               | 2.29161                   | 12.03096   | 0.35977  |
| 3.2     | 0.73395               | 3.35185                   | 0.00314    | 0.18667  | 0.09135               | 2.75531                   | 16.27422   | 0.37453  |
| 3.4     | 0.69873               | 3.18958                   | 0.00308    | 0.18638  | 0.08304               | 2.76181                   | 14.05481   | 0.36481  |
| 3.6     | 0.67008               | 3.03425                   | 0.00301    | 0.18413  | 0.07945               | 3.04227                   | 14.49693   | 0.35989  |
| 3.8     | 0.64122               | 2.8666                    | 0.00294    | 0.18238  | 0.07579               | 3.23927                   | 14.33641   | 0.3621   |
| 4       | 0.60754               | 2.71549                   | 0.00288    | 0.182    | 0.0747                | 3.05869                   | 10.44943   | 0.34135  |
| 4.2     | 0.57669               | 2.58662                   | 0.00282    | 0.1821   | 0.06934               | 2.90432                   | 7.89861    | 0.32456  |
| 4.4     | 0.55392               | 2.46551                   | 0.00278    | 0.18153  | 0.05753               | 2.79948                   | 6.21026    | 0.31152  |
| 4.6     | 0.53083               | 2.35798                   | 0.00273    | 0.1813   | 0.05494               | 2.69993                   | 4.92106    | 0.30188  |
| 4.8     | 0.51015               | 2.26055                   | 0.00268    | 0.18087  | 0.05754               | 2.56289                   | 3.77423    | 0.28923  |
| 5       | 0.4905                | 2.17255                   | 0.00263    | 0.18093  | 0.05524               | 2.42096                   | 2.89749    | 0.27553  |
| 5.5     | 0.45074               | 1.97118                   | 0.00252    | 0.17902  | 0.04474               | 2.17099                   | 1.63785    | 0.25458  |
| 6       | 0.41654               | 1.80533                   | 0.00242    | 0.17708  | 0.01843               | 1.9517                    | 0.97512    | 0.23378  |
| 6.5     | 0.38549               | 1.673                     | 0.00232    | 0.17752  | 0                     | 1.78231                   | 0.62001    | 0.21658  |
| 7       | 0.3607                | 1.55472                   | 0.00224    | 0.17708  | 0                     | 1.6479                    | 0.41443    | 0.20509  |
| 7.5     | 0.33867               | 1.45149                   | 0.00216    | 0.17445  | 0                     | 1.52208                   | 0.28292    | 0.19107  |
| 8       | 0.32118               | 1.35903                   | 0.00208    | 0.17227  | 0                     | 1.41821                   | 0.19974    | 0.18001  |
| 8.5     | 0.30292               | 1.28153                   | 0.002      | 0.17123  | 0.26798               | 1.35076                   | 0.14295    | 0.18463  |
| 9       | 0.29018               | 1.20947                   | 0.00194    | 0.16773  | 0.25583               | 1.26899                   | 0.10569    | 0.17591  |
| 9.5     | 0.27364               | 1.14977                   | 0.00185    | 0.16742  | 0.24563               | 1.19783                   | 0.07957    | 0.16798  |
| 10      | 0.26163               | 1.08863                   | 0.00177    | 0.16403  | 0.23266               | 1.13297                   | 0.06013    | 0.16219  |
| 10.5    | 0.24011               | 1.03168                   | 0.00159    | 0.16192  | 0.22304               | 1.07162                   | 0.0465     | 0.15942  |
| 11      | 0.22952               | 0.98476                   | 0.00153    | 0.16     | 0.21388               | 1.02031                   | 0.03645    | 0.15598  |
| 11.5    | 0.22111               | 0.9412                    | 0.00146    | 0.15759  | 0.20711               | 0.97165                   | 0.02905    | 0.14971  |
| 12      | 0.21018               | 0.89644                   | 0.00138    | 0.15537  | 0.19596               | 0.92723                   | 0.02244    | 0.15069  |
| 12.5    | 0.20523               | 0.85893                   | 0.00132    | 0.14945  | 0.19126               | 0.88804                   | 0.01829    | 0.14589  |
| 13      | 0.19753               | 0.82789                   | 0.00126    | 0.14904  | 0.18531               | 0.85258                   | 0.01495    | 0.14282  |
| 13.5    | 0.19075               | 0.79665                   | 0.00119    | 0.14576  | 0.18038               | 0.81876                   | 0.01224    | 0.13938  |
| 14      | 0.18396               | 0.76897                   | 0.00112    | 0.14322  | 0.17297               | 0.79139                   | 0.01001    | 0.14118  |
| 14.5    | 0.17688               | 0.74415                   | 0.00105    | 0.14153  | 0.16767               | 0.76364                   | 0.00825    | 0.13957  |
| 15      | 0.16894               | 0.72731                   | 9.93E-04   | 0.14617  | 0.16021               | 0.75247                   | 0.00698    | 0.15401  |
| 15.5    | 0.1619                | 0.70584                   | 9.22E-04   | 0.14555  | 0.15607               | 0.72576                   | 0.00578    | 0.15084  |
| 16      | 0.15866               | 0.68188                   | 8.63E-04   | 0.14006  | 0.15304               | 0.70019                   | 0.00482    | 0.14714  |
| 16.5    | 0.15206               | 0.66323                   | 7.94E-04   | 0.13944  | 0.14836               | 0.67825                   | 0.00399    | 0.14844  |

|              |                           |            |          |         |         |         |          |         |
|--------------|---------------------------|------------|----------|---------|---------|---------|----------|---------|
| 17           | 0.14804                   | 0.64342    | 7.38E-04 | 0.13661 | 0.14375 | 0.65965 | 0.00333  | 0.15053 |
| 17.5         | 0.14002                   | 0.62946    | 6.74E-04 | 0.13676 | 0.13975 | 0.63971 | 0.00277  | 0.15008 |
| 18           | 0.13722                   | 0.61076    | 6.20E-04 | 0.13471 | 0.13627 | 0.62221 | 0.00231  | 0.15101 |
| 18.5         | 0.13175                   | 0.59575    | 5.65E-04 | 0.1322  | 0.13192 | 0.60546 | 0.00191  | 0.1526  |
| 19           | 0.13031                   | 0.57812    | 5.18E-04 | 0.12765 | 0.12969 | 0.58804 | 0.00159  | 0.15235 |
| 19.5         | 0.12146                   | 0.56907    | 4.64E-04 | 0.12989 | 0.1258  | 0.57382 | 0.00132  | 0.15312 |
| 20           | 0.12235                   | 0.55049    | 4.24E-04 | 0.12415 | 0.12122 | 0.5611  | 0.00109  | 0.15746 |
| 20.5         | 0.11669                   | 0.53921    | 3.79E-04 | 0.12348 | 0.12052 | 0.54444 | 9.08E-04 | 0.15679 |
| 21           | 0.10966                   | 0.53023    | 3.37E-04 | 0.12481 | 0.1187  | 0.531   | 7.56E-04 | 0.1558  |
| 21.5         | 0.1038                    | 0.52179    | 2.97E-04 | 0.1275  | 0.11648 | 0.51706 | 6.27E-04 | 0.1523  |
| 22           | 0.11053                   | 0.50026    | 2.72E-04 | 0.1176  | 0.11059 | 0.50926 | 5.14E-04 | 0.15559 |
| 22.5         | 0.09969                   | 0.49757    | 2.37E-04 | 0.12018 | 0.11243 | 0.49313 | 4.32E-04 | 0.15306 |
| 23           | 0.09436                   | 0.49061    | 2.05E-04 | 0.12538 | 0.10904 | 0.48286 | 3.57E-04 | 0.1497  |
| 23.5         | 0.09427                   | 0.47787    | 1.84E-04 | 0.11958 | 0.10852 | 0.47109 | 2.99E-04 | 0.14612 |
| 24           | 0.10138                   | 0.45879    | 1.68E-04 | 0.10465 | 0.12113 | 0.44509 | 2.66E-04 | 0.12073 |
| 24.5         | 0.09228                   | 0.45671    | 1.43E-04 | 0.11057 | 0.12126 | 0.43366 | 2.23E-04 | 0.11779 |
| 25           | 0.08711                   | 0.45062    | 1.23E-04 | 0.10789 | 0.12273 | 0.4204  | 1.88E-04 | 0.10598 |
| 25.5         | 0.09353                   | 0.43351    | 1.11E-04 | 0.09625 | 0.13103 | 0.40129 | 1.61E-04 | 0.09368 |
| 26           | 0.09159                   | 0.42541    | 9.59E-05 | 0.09297 | 0.13098 | 0.39136 | 1.38E-04 | 0.08667 |
| 26.5         | 0.10156                   | 0.40579    | 8.65E-05 | 0.0839  | 0.13671 | 0.3756  | 1.19E-04 | 0.07067 |
| 27           | 0.10761                   | 0.3902     | 7.73E-05 | 0.06207 | 0.12376 | 0.3787  | 9.71E-05 | 0.06948 |
| 27.5         | 0.10778                   | 0.38084    | 6.80E-05 | 0.0602  | 0.18502 | 0.30806 | 1.04E-04 | 0.01984 |
| 28           | 0.08624                   | 0.39399    | 5.35E-05 | 0.07105 | 0.16619 | 0.31839 | 8.39E-05 | 0.02288 |
| 28.5         | 0.09526                   | 0.37677    | 4.86E-05 | 0.04777 | 0.14226 | 0.33418 | 6.33E-05 | 0.03457 |
| 29           | 0.1288                    | 0.33515    | 4.65E-05 | 0.03678 | 0.21134 | 0.25728 | 7.22E-05 | 0.00437 |
| 29.5         | 0.08943                   | 0.3666     | 3.69E-05 | 0.02926 | 0.06405 | 0.39625 | 3.61E-05 | 0.03178 |
| 30           | 0.12704                   | 0.32048    | 3.65E-05 | 0       | 0.14033 | 0.31193 | 3.99E-05 | 0       |
| <i>T</i> (K) | $\Delta\chi$<br>(emu/mol) | $\tau$ (s) | $\alpha$ |         |         |         |          |         |
|              | $H_{dc} = 1$ kOe (HF)     |            |          |         |         |         |          |         |
| 2            | 0.87631                   | 0.00413    | 0.25812  |         |         |         |          |         |
| 2.15         | 0.81867                   | 0.00354    | 0.26354  |         |         |         |          |         |
| 2.4          | 0.74427                   | 0.00275    | 0.27353  |         |         |         |          |         |
| 2.6          | 0.69635                   | 0.00223    | 0.2782   |         |         |         |          |         |
| 2.8          | 0.64725                   | 0.00177    | 0.27931  |         |         |         |          |         |
| 3            | 0.61528                   | 0.00144    | 0.29201  |         |         |         |          |         |
| 3.2          | 0.57904                   | 0.00117    | 0.28984  |         |         |         |          |         |
| 3.4          | 0.55856                   | 9.47E-04   | 0.29807  |         |         |         |          |         |
| 3.6          | 0.53207                   | 7.73E-04   | 0.29495  |         |         |         |          |         |
| 3.8          | 0.50001                   | 6.25E-04   | 0.28965  |         |         |         |          |         |
| 4            | 0.47607                   | 5.38E-04   | 0.28964  |         |         |         |          |         |
| 4.2          | 0.45863                   | 4.46E-04   | 0.29349  |         |         |         |          |         |
| 4.4          | 0.44974                   | 3.55E-04   | 0.3103   |         |         |         |          |         |
| 4.6          | 0.43075                   | 3.01E-04   | 0.30275  |         |         |         |          |         |
| 4.8          | 0.40954                   | 2.62E-04   | 0.295    |         |         |         |          |         |
| 5            | 0.39457                   | 2.23E-04   | 0.29489  |         |         |         |          |         |

**Table S6.** Relaxation fitting parameters from the least-square fitting of the Cole-Cole plots of **3** by the single-component generalized Debye model at 1000 Oe dc field.

| $T$ (K)                  | $\chi_s$ (emu/mol) | $\Delta\chi$ (emu/mol) | $\tau$ (s) | $\alpha$ |
|--------------------------|--------------------|------------------------|------------|----------|
| $H_{dc} = 1 \text{ kOe}$ |                    |                        |            |          |
| 2                        | 0.10746            | 5.32697                | 0.34292    | 0.18627  |
| 2.15                     | 0.10048            | 4.95191                | 0.25997    | 0.18611  |
| 2.4                      | 0.08893            | 4.45045                | 0.16697    | 0.18785  |
| 2.6                      | 0.07379            | 4.0966                 | 0.11314    | 0.19531  |
| 2.8                      | 0.06206            | 3.82027                | 0.07884    | 0.20281  |
| 3                        | 0.05319            | 3.5693                 | 0.05493    | 0.21061  |
| 3.2                      | 0.04009            | 3.37359                | 0.03927    | 0.2202   |
| 3.4                      | 0.03246            | 3.19279                | 0.02835    | 0.22795  |
| 3.6                      | 0.01985            | 3.02637                | 0.02046    | 0.23355  |
| 3.8                      | 0.0152             | 2.87603                | 0.01526    | 0.2376   |
| 4                        | 0.00564            | 2.74015                | 0.01146    | 0.24202  |
| 4.2                      | 3.84E-04           | 2.62054                | 0.00881    | 0.24568  |
| 4.4                      | 0                  | 2.50256                | 0.00683    | 0.24523  |
| 4.6                      | 0                  | 2.39855                | 0.00542    | 0.24574  |
| 4.8                      | 0                  | 2.29935                | 0.00431    | 0.24608  |
| 5                        | 0                  | 2.21131                | 0.00347    | 0.24656  |
| 5.5                      | 0                  | 2.01504                | 0.00211    | 0.24769  |
| 6                        | 0                  | 1.85001                | 0.00133    | 0.2481   |
| 6.5                      | 0                  | 1.71453                | 8.81E-04   | 0.24833  |
| 7                        | 0                  | 1.59593                | 5.96E-04   | 0.2506   |
| 7.5                      | 0                  | 1.49441                | 4.11E-04   | 0.25587  |
| 8                        | 0                  | 1.403                  | 2.84E-04   | 0.25859  |
| 8.5                      | 0                  | 1.32293                | 1.99E-04   | 0.26004  |
| 9                        | 0                  | 1.25047                | 1.40E-04   | 0.26122  |
| 9.5                      | 0                  | 1.18624                | 1.00E-04   | 0.26003  |
| 10                       | 0.03374            | 1.09263                | 7.62E-05   | 0.24948  |

**Table S7.** CASSCF energies ( $\text{cm}^{-1}$ ) and g-factors for the first eight Kramers' doublets of **1–3**.

| Molecule | KD | E ( $\text{cm}^{-1}$ ) | $g_x$    | $g_y$    | $g_z$     |
|----------|----|------------------------|----------|----------|-----------|
| <b>1</b> | 1  | 0.0                    | 0.006225 | 0.007459 | 19.618221 |
|          | 2  | 194.5                  | 0.116942 | 0.202182 | 16.698357 |
|          | 3  | 245.9                  | 0.090887 | 0.214980 | 19.086078 |
|          | 4  | 317.1                  | 0.154904 | 0.794469 | 12.160257 |
|          | 5  | 368.6                  | 1.240526 | 2.281376 | 13.009951 |
|          | 6  | 409.5                  | 1.591427 | 4.670779 | 10.034933 |
|          | 7  | 470.9                  | 2.203363 | 4.174282 | 14.756280 |
|          | 8  | 609.3                  | 0.173917 | 0.426065 | 19.020685 |
| <b>2</b> | 1  | 0.0                    | 0.002126 | 0.003183 | 19.749982 |
|          | 2  | 205.8                  | 0.033876 | 0.047223 | 17.162357 |
|          | 3  | 342.9                  | 0.259272 | 0.422072 | 14.130687 |
|          | 4  | 423.3                  | 1.000680 | 1.782779 | 11.741771 |
|          | 5  | 481.8                  | 1.581204 | 1.751083 | 15.987122 |
|          | 6  | 529.0                  | 0.385897 | 6.259126 | 7.333016  |
|          | 7  | 610.9                  | 2.514319 | 4.100738 | 13.269452 |
|          | 8  | 718.9                  | 0.384544 | 1.345818 | 18.206785 |
| <b>3</b> | 1  | 0.0                    | 0.018641 | 0.031649 | 19.540294 |
|          | 2  | 150.0                  | 0.594557 | 1.260470 | 15.468396 |
|          | 3  | 199.1                  | 0.294455 | 1.350715 | 14.300613 |
|          | 4  | 280.9                  | 0.823840 | 2.522789 | 12.922492 |
|          | 5  | 353.6                  | 1.322978 | 4.827725 | 9.653844  |
|          | 6  | 444.5                  | 2.366021 | 5.409026 | 9.435083  |
|          | 7  | 553.3                  | 1.597940 | 2.503451 | 12.356695 |
|          | 8  | 635.8                  | 0.602097 | 2.466061 | 17.103471 |

**Table S8.** Structural and magnetic features of linear trinuclear Zn-Dy-Zn complexes with salen-type compartmental Schiff base ligands.<sup>a</sup>

| Complex                                                                                                                                                                                       | Ln center geometry                                                                    | Field (Oe) | $U_{\text{eff}}/\text{K}$ | $t_0$ (s)                                      | Ref.      |
|-----------------------------------------------------------------------------------------------------------------------------------------------------------------------------------------------|---------------------------------------------------------------------------------------|------------|---------------------------|------------------------------------------------|-----------|
| [Dy{Zn(L <sup>1</sup> )(AcO)} <sub>2</sub> ]BPh <sub>4</sub>                                                                                                                                  | deca-coordination                                                                     | 1000       | 22.4                      | $5.3 \times 10^{-7}$                           | 60        |
| [(L <sup>2</sup> Zn(H <sub>2</sub> O)) <sub>2</sub> Dy(H <sub>2</sub> O)](CF <sub>3</sub> SO <sub>3</sub> ) <sub>3</sub>                                                                      | MFF-9 (C <sub>s</sub> )                                                               | 0<br>1000  | 96.9<br>128.6             | $2.4 \times 10^{-4}$<br>$1.8 \times 10^{-8}$   | 61        |
| [(L <sup>2</sup> ZnBr) <sub>2</sub> Dy(H <sub>2</sub> O)](ClO <sub>4</sub> )                                                                                                                  | TCTPR-9 (D <sub>3h</sub> )                                                            | 0<br>1000  | 146.8<br>214.7            | $9.2 \times 10^{-8}$<br>$9.8 \times 10^{-9}$   | 61        |
| [(L <sup>2</sup> ZnCl) <sub>2</sub> Dy(H <sub>2</sub> O)](ClO <sub>4</sub> )(MeOH)                                                                                                            | TCTPR-9 (D <sub>3h</sub> )                                                            | 0<br>1000  | 146.1<br>202.4            | $9.9 \times 10^{-8}$<br>$1.5 \times 10^{-8}$   | 61        |
| [Dy(ZnL <sup>3</sup> ) <sub>2</sub> (CH <sub>3</sub> COO)Cl <sub>2</sub> ]·CH <sub>2</sub> Cl <sub>2</sub>                                                                                    | TDD-8 (D <sub>2d</sub> ),<br>SAPR-8 (D <sub>4d</sub> )                                | 700        | 19                        | $1.5 \times 10^{-5}$                           | 62        |
| [Zn <sub>2</sub> (L <sup>4</sup> ) <sub>2</sub> DyCl <sub>3</sub> ]·2H <sub>2</sub> O <sup>b</sup>                                                                                            | CSAPR-9 (C <sub>4v</sub> ),<br>TCTPR-9 (D <sub>3h</sub> ),<br>MFF-9 (C <sub>s</sub> ) | 0<br>1000  | 430<br>481                | $7.4 \times 10^{-11}$<br>$1.3 \times 10^{-11}$ | 63        |
| [Zn <sub>2</sub> (L <sup>4</sup> ) <sub>2</sub> Dy(MeOH)Br <sub>3</sub> ]·3H <sub>2</sub> O <sup>b</sup>                                                                                      | CSAPR-9 (C <sub>4v</sub> ),<br>TCTPR9 (C <sub>4v</sub> ),<br>MFF-9 (C <sub>s</sub> )  | 0          | 233                       | $2.5 \times 10^{-8}$                           | 63        |
| [Zn <sub>2</sub> (L <sup>4</sup> ) <sub>2</sub> Dy(H <sub>2</sub> O)Br <sub>2</sub> ]·[ZnBr <sub>4</sub> ] <sub>0.5</sub> <sup>b</sup>                                                        | CSAPR-9(C <sub>4v</sub> ),<br>TCTPR9 (C <sub>4v</sub> ),<br>MFF-9 (C <sub>s</sub> )   | 0          | 121                       | $8.5 \times 10^{-7}$                           | 63        |
| [Zn <sub>2</sub> (L <sup>5</sup> ) <sub>2</sub> DyCl <sub>3</sub> ]·2H <sub>2</sub> O <sup>b</sup>                                                                                            | CSAPR-9(C <sub>4v</sub> ),<br>TCTPR9 (C <sub>4v</sub> ),<br>MFF-9 (C <sub>s</sub> )   | 0          | 398                       | $3.5 \times 10^{-10}$                          | 63        |
| [(ZnL <sup>1</sup> Cl) <sub>2</sub> Dy(H <sub>2</sub> O)] <sub>4</sub> [ZnCl <sub>4</sub> ] <sub>2</sub> ·H <sub>2</sub> O                                                                    | CSAPR-9 (C <sub>4v</sub> )                                                            | 0<br>1000  | 67.6<br>90.6              | $2.0 \times 10^{-6}$<br>$2.2 \times 10^{-5}$   | 64        |
| [Zn <sub>2</sub> Dy(R,R-L <sup>5</sup> ) <sub>2</sub> (H <sub>2</sub> O) <sub>4</sub> ](ClO <sub>4</sub> ) <sub>3</sub>                                                                       | CSAPR-9 (C <sub>4v</sub> )                                                            | 400        | 22.46                     | $5.06 \times 10^{-6}$                          | 65        |
| [(L <sup>6</sup> ZnCl <sub>0.5</sub> (OH) <sub>0.5</sub> )(L <sup>6</sup> ZnCl)Dy-(H <sub>2</sub> O)](ZnCl <sub>4</sub> ) <sub>0.5</sub>                                                      | CSAPR-9 (C <sub>4v</sub> ),<br>JTCTPR-9 (D <sub>3h</sub> ),<br>MFF-9(C <sub>s</sub> ) | 0          | 250                       | $2.57 \times 10^{-9}$                          | 66        |
| [DyZn <sub>2</sub> (L <sup>7</sup> )Cl <sub>2</sub> (H <sub>2</sub> O)](ClO <sub>4</sub> )·0.5MeOH·0.25 H <sub>2</sub> O                                                                      | MFF-9 (C <sub>s</sub> ),<br>TCTPR-9 (D <sub>3h</sub> )                                | 1800       | 212.1                     | $7.0 \times 10^{-10}$                          | 67        |
| [DyZn <sub>2</sub> (L <sup>8</sup> )Cl <sub>2</sub> (H <sub>2</sub> O)] [DyZn <sub>2</sub> (L <sup>8</sup> )Cl <sub>2</sub> (MeOH)](ClO <sub>4</sub> ) <sub>2</sub> ·MeOH·0.5H <sub>2</sub> O | MFF-9 (C <sub>s</sub> ),<br>TCTPR-9 (D <sub>3h</sub> )                                | 1800       | 194.5                     | $3.1 \times 10^{-9}$                           | 67        |
| [DyZn <sub>2</sub> (L <sup>7</sup> )Cl <sub>2</sub> (H <sub>2</sub> O)](CF <sub>3</sub> SO <sub>3</sub> )·0.5MeOH                                                                             | MFF-9 (C <sub>s</sub> ),<br>TCTPR-9 (D <sub>3h</sub> )                                | 2000       | 203.5                     | $1.0 \times 10^{-10}$                          | 67        |
| [DyZn <sub>2</sub> (L <sup>8</sup> )Cl <sub>2</sub> (H <sub>2</sub> O)]-<br>[DyZn <sub>2</sub> (L <sup>8</sup> )Cl <sub>2</sub> (MeOH)](CF <sub>3</sub> SO <sub>3</sub> ) <sub>2</sub> ·MeOH  | MFF-9 (C <sub>s</sub> ),<br>TCTPR-9 (D <sub>3h</sub> )                                | 2000       | 70.1                      | $8.0 \times 10^{-7}$                           | 67        |
| [DyZn <sub>2</sub> (L <sup>7</sup> )Br <sub>2</sub> (H <sub>2</sub> O)](CF <sub>3</sub> SO <sub>3</sub> )·0.25MeOH                                                                            | MFF-9 (C <sub>s</sub> ),<br>TCTPR-9 (D <sub>3h</sub> )                                | 2000       | 207.3                     | $1.5 \times 10^{-10}$                          | 67        |
| [DyZn <sub>2</sub> (L <sup>8</sup> )Br <sub>2</sub> (H <sub>2</sub> O)] [DyZn <sub>2</sub> (L <sup>8</sup> )Br <sub>2</sub> (MeOH)]<br>(CF <sub>3</sub> SO <sub>3</sub> ) <sub>2</sub>        | MFF-9 (C <sub>s</sub> )/<br>TCTPR-9 (D <sub>3h</sub> )                                | 2000       | 218.1                     | $3.5 \times 10^{-11}$                          | 67        |
| [Zn <sub>2</sub> Dy(L) <sub>2</sub> Cl <sub>2</sub> (H <sub>2</sub> O)](ClO <sub>4</sub> )·4H <sub>2</sub> O (1),                                                                             | CSAPR-9 (C <sub>4v</sub> ),<br>JTCTPR-9 (D <sub>3h</sub> ),<br>MFF-9(C <sub>s</sub> ) | 0<br>1000  | 244<br>309                | $4.8 \times 10^{-9}$<br>$5.4 \times 10^{-10}$  | This work |
| [Zn <sub>2</sub> Dy(L) <sub>2</sub> Br <sub>2</sub> (H <sub>2</sub> O)](ClO <sub>4</sub> )·4H <sub>2</sub> O (2)                                                                              | CSAPR-9 (C <sub>4v</sub> ),<br>JTCTPR-9 (D <sub>3h</sub> ),<br>MFF-9(C <sub>s</sub> ) | 0<br>1000  | 211<br>269                | $3.6 \times 10^{-8}$<br>$7.7 \times 10^{-9}$   | This work |
| [Zn <sub>2</sub> Dy(L) <sub>2</sub> (OAc)I(H <sub>2</sub> O)]I <sub>3</sub> ·4H <sub>2</sub> O (3)                                                                                            | CSAPR-9 (C <sub>4v</sub> ),<br>JTCTPR-9 (D <sub>3h</sub> ),<br>MFF-9(C <sub>s</sub> ) | 1000       | 72                        | $2.2 \times 10^{-7}$                           | This work |

<sup>a</sup> Abbreviations: H<sub>2</sub>L<sup>1</sup> = (ethane-1,2-diylbis(azanylylidene))bis(methanylylidene))bis(2-methoxyphenol); H<sub>2</sub>L<sup>2</sup> = (2,2-dimethylpropane-1,3-diylbis(azanylylidene))bis(methanylylidene))bis(2-methoxy-4-methylphenol); H<sub>2</sub>L<sup>3</sup> = *N,N*-bis(3-ethoxysalicylidene)phenylene-1,2-diamine; H<sub>2</sub>L<sup>4</sup> = 1,2-phenylenebis(azanylylidene))bis(methanylylidene))bis(2-methoxy-4-methylphenol); H<sub>2</sub>L<sup>5</sup> = cyclohexane-1,2-diylbis(azanylylidene))bis(methanylylidene))bis(2-methoxy-4-methylphenol); H<sub>2</sub>L<sup>6</sup> = *N,N'*-bis(3-methoxysalicylaldimine)-1,3-propylene-2-ol; H<sub>2</sub>L<sup>7</sup> = 2-((*E*)-((1*R*,2*R*)-2-((*E*)-2-hydroxy-3-methoxybenzylideneamino)cyclohexylimino)methyl)-6-methoxyphenol; H<sub>2</sub>L<sup>8</sup> = 2-((*E*)-((1*S*,2*S*)-2-((*E*)-2-hydroxy-3-methoxybenzylideneamino)cyclohexylimino)methyl)-6-methoxyphenol; MFF-9 = Muffin; TCTPR-9 = Spherical tricapped trigonal prism; CSAPR-9 = Spherical capped square antiprism; JTCTPR-9 = Tricapped trigonal prism J51. <sup>b</sup> purely Arrhenius law was applied.
